# Supplementary material for: Conformational properties and folding analysis of a series of seven oligoamide foldamers
Source: Royal Society of Chemistry journal article supplement (doi:10.1039/c5ce02458g), 2016-01-01
Supplement: c5ce02458g1.pdf [file c5ce02458g1.pdf]

# Conformational Properties and Folding Analysis of a Series of Seven Oligoamide Foldamers

## Supplementary Information

Aku Suhonen, Minna Kortelainen, Elisa Nauha, Sanna Yliniemelä-Sipari, Petri M. Pihko and  
Maija Nissinen\*

|     |                                                                                 |    |
|-----|---------------------------------------------------------------------------------|----|
| 1   | Synthesis and NMR spectra of foldamer 3 .....                                   | 2  |
| 2   | Powder X-ray diffraction and TGA-DTA data for foldamers 1 and 2 .....           | 7  |
| 2.1 | Foldamer 1 .....                                                                | 7  |
| 2.2 | Foldamer 2 .....                                                                | 8  |
| 3   | Additional crystallography material .....                                       | 10 |
| 3.1 | Details on the crystallization experiments .....                                | 10 |
| 3.2 | Slurry experiments .....                                                        | 12 |
| 3.3 | Crystal data and collection parameters for isomorphous solvates .....           | 12 |
| 3.4 | Crystal data and collection parameters for previously published structures..... | 13 |
| 3.5 | Notes on the crystallographic data .....                                        | 14 |
| 3.6 | Packing coefficient analysis.....                                               | 16 |
| 3.7 | Additional Foldamer Figures .....                                               | 17 |
| 3.8 | Hydrogen bonding parameters .....                                               | 23 |
| 4   | References.....                                                                 | 26 |

## 1 Synthesis and NMR spectra of foldamer **3**

The starting materials were commercially available and used as such unless otherwise noted. The glassware was dried at 120°C prior to use. Dichloromethane was dried by distilling it over CaCl<sub>2</sub> and stored over Linde type 3 Å sieves under nitrogen atmosphere. Tetrahydrofuran (THF) was dried with MBraun solvent purification system. Triethylamine (Et<sub>3</sub>N) was stored on molecular sieves (3 Å) and under nitrogen atmosphere.

NMR spectra were measured with Bruker Avance DRX 500 spectrometer and the chemical shifts were calibrated to the residual proton and carbon resonance of the deuterated solvent. The melting point was measured in an open capillary using a Stuart SMP30 melting point apparatus and is uncorrected. An ESI-TOF mass spectrum was measured with a LCT Micromass spectrometer. Elemental analysis was done with a Vario EL III instrument.

### Synthesis of *N*<sup>2</sup>-(2-aminophenyl)-*N*<sup>6</sup>-(2-benzamidophenyl)-pyridine-2,6-dicarboxamide **3**.<sup>1</sup>

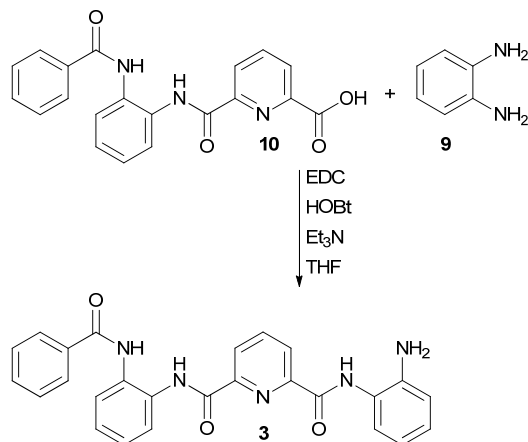

**Scheme 1.** The reaction scheme for the synthesis of compound **3**.

The synthesis was carried out under an argon atmosphere. *O*-phenylenediamine **9** (1.20 g; 11.13 mmol), 6-((2-benzamidophenyl)carbamoyl)picolinic acid **10** (1.00 g; 2.76 mmol) and hydroxybenzotriazole hydrate (HOBT) (0.43 g; 2.82 mmol) were dissolved in THF (120 ml). The solution was cooled to 0°C, and Et<sub>3</sub>N (0.4 ml; 2.87 mmol) and 1-ethyl-3-(3-dimethylaminopropyl)carbodiimide (EDC) (0.5 ml; 2.82 mmol) were added to the solution. The cooled solution was stirred for an hour, allowed to warm to RT and stirred overnight. The solution was concentrated as oil and ethyl acetate (EtOAc) was added. This resulted in the product **3** precipitating as a white solid, yield 0.85 g (68%). mp. 243-245 °C; <sup>1</sup>H NMR (ESI<sup>+</sup>)

(500 MHz, DMSO-d<sub>6</sub>, 30 °C):  $\delta$  = 4.92 (s, 2H; q), 6.61 (td,  $^3J_{\text{HH}} = 1.4$  Hz,  $^3J_{\text{HH}} = 7.6$  Hz 1H; k), 6.83 (dd,  $^3J_{\text{HH}} = 1.4$  Hz,  $^3J_{\text{HH}} = 8.0$  Hz, 1H; m), 7.00 (dd,  $^3J_{\text{HH}} = 1.4$  Hz,  $^3J_{\text{HH}} = 7.9$  Hz, 1H; j), 7.03-7.06 (m, 1H; l), 7.31-7.37 (m, 4H; b,e), 7.49-7.53 (m, 1H; a), 7.66-7.67 (m, 1H; d), 7.76-7.78 (m, 1H; f), 7.81-7.83 (m, 2H; c), 8.28 (t,  $^3J_{\text{HH}} = 7.7$  Hz, 1H; h), 8.33-8.35 (m, 1H; g/i), 8.38-8.40 (m, 1H; g/i), 10.20 (s, 1H; n), 10.44 (s, 1H; p), 11.14 (s, 1H; o),  $^{13}\text{C}$  NMR (ESI $^\dagger$ ) (126 MHz, DMSO-d<sub>6</sub>, 30 °C):  $\delta$  = 116.05 (m/k), 116.19 (m/k), 122.15 (j'), 124.80 (g/i), 125.12 (g/i), 125.70 (d/e/f), 125.81 (d/e/f), 125.94 (d/e/f), 127.17 (j,l), 127.59 (c), 128.34 (b), 130.63 (d'), 131.41 (f'), 131.74 (a), 133.85 (c'), 139.95 (h), 143.83 (m'), 148.36 (g'/i'), 148.79 (g'/i'), 161.66 (o',p'), 166.01 (n'); MS (ESI-TOF)  $m/z$ : 474.09 [M + Na $^+$ ]; Elemental analysis calcd (%) for C<sub>26</sub>H<sub>21</sub>N<sub>5</sub>O<sub>3</sub>: C 69.2, H 4.7, N 15.5; found C 68.8, H 4.7, N 15.3.

### NMR spectra for the foldamer 3

$^1\text{H}$ ,  $^{13}\text{C}$ , COSY, HMBC and HMQC spectra were measured for the foldamer 3 from DMSO- $d_6$ . The spectra have been scaled for clarity to display only the aromatic, amine and amide peaks.

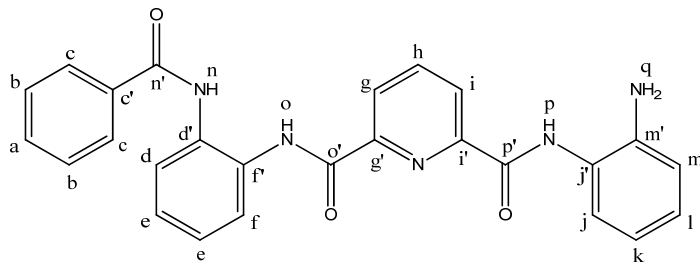

### $^1\text{H}$ NMR spectrum

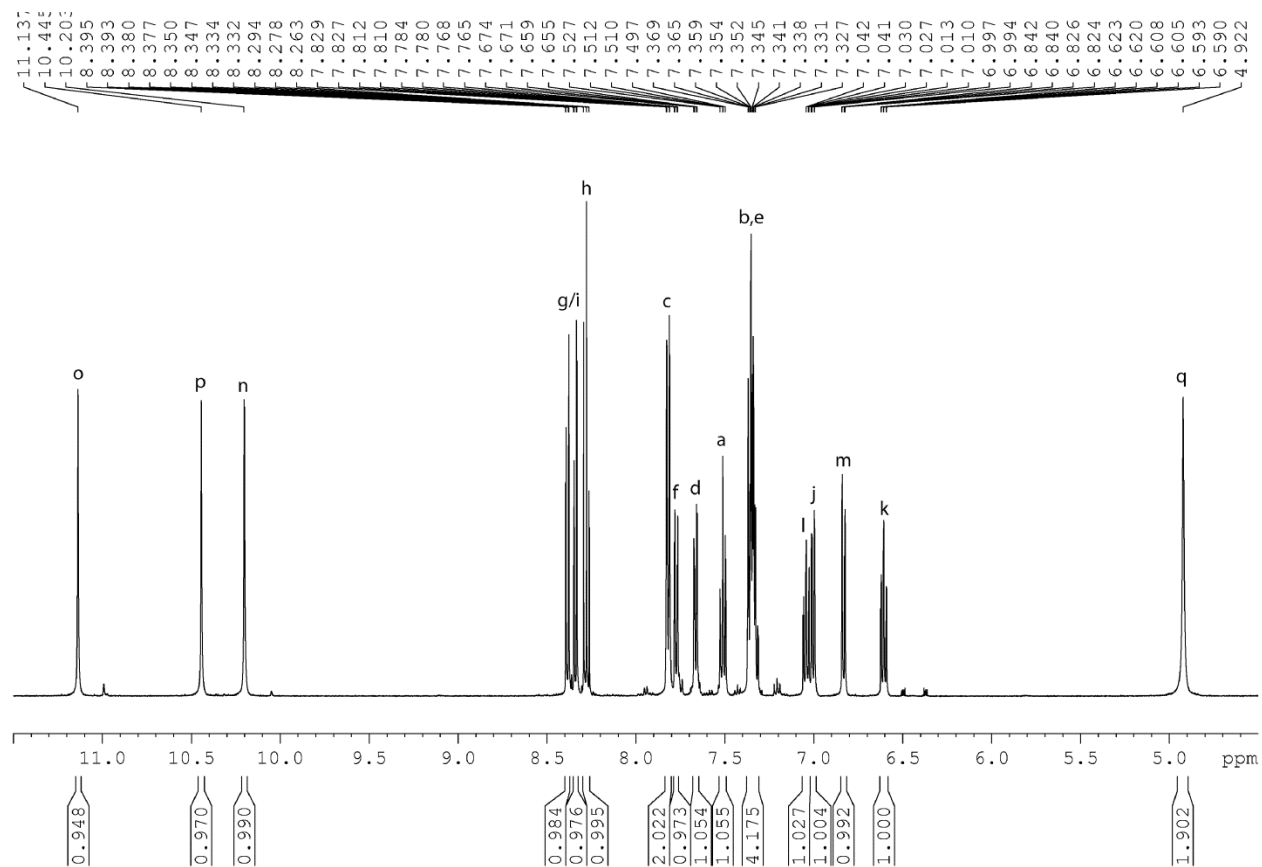

# $^{13}\text{C}$ NMR spectrum

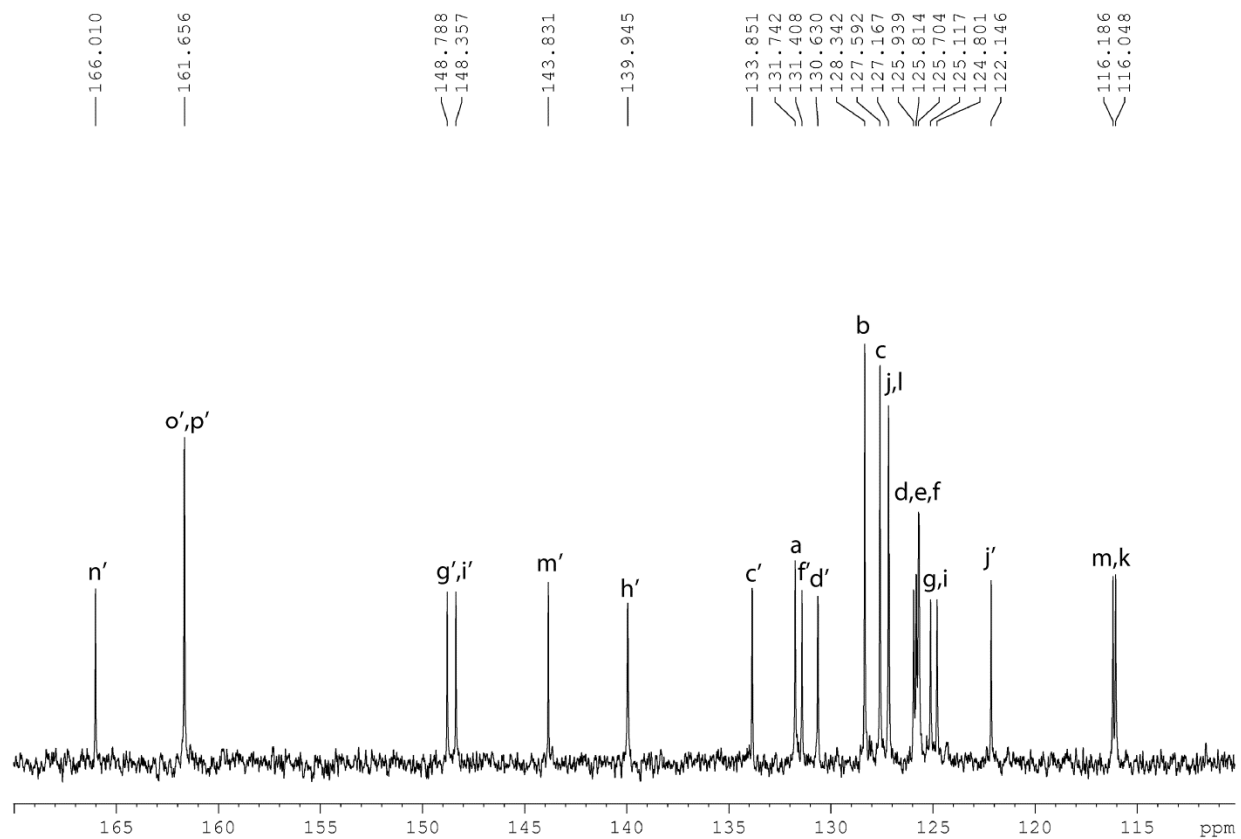

# COSY

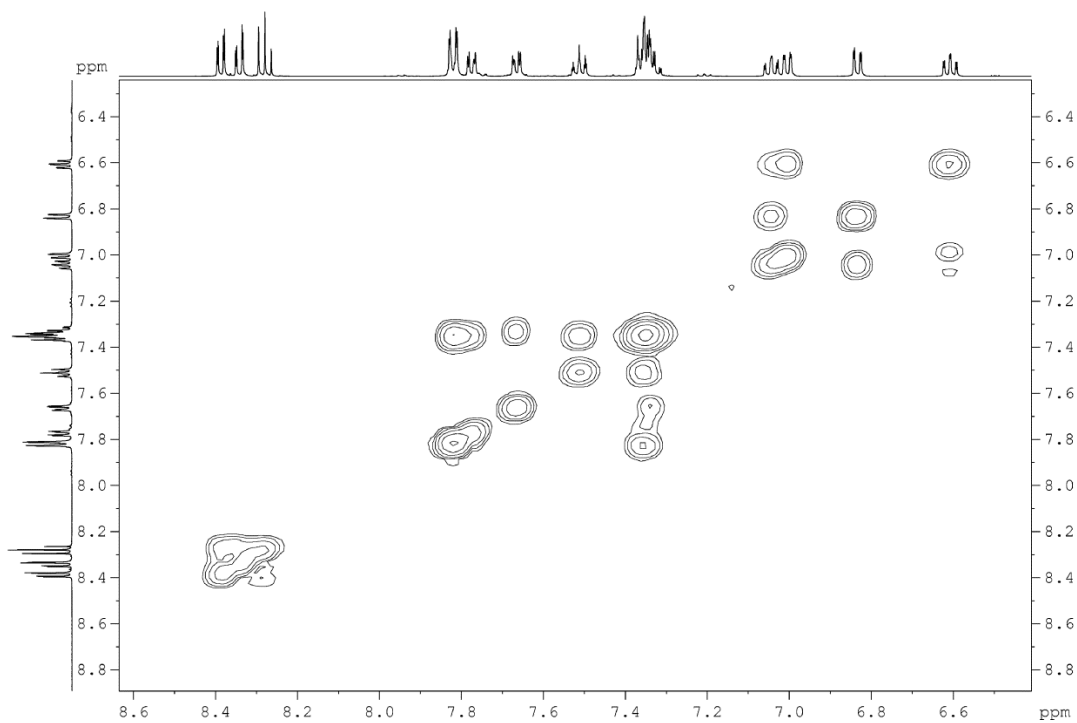

# HMQC

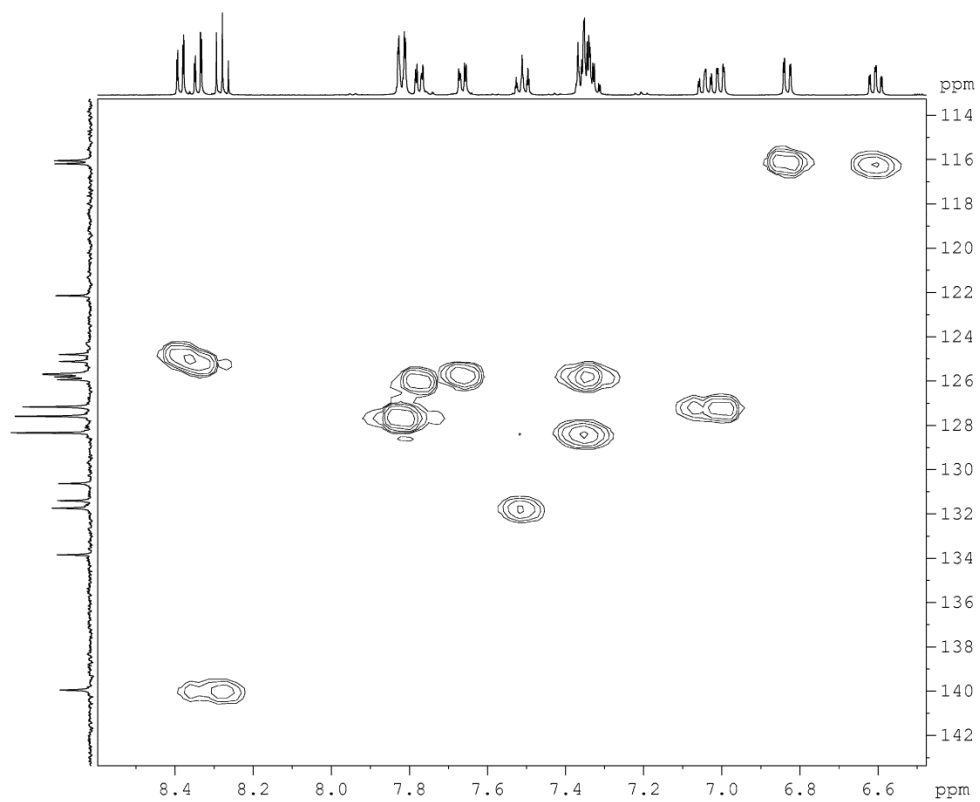

# HMBC

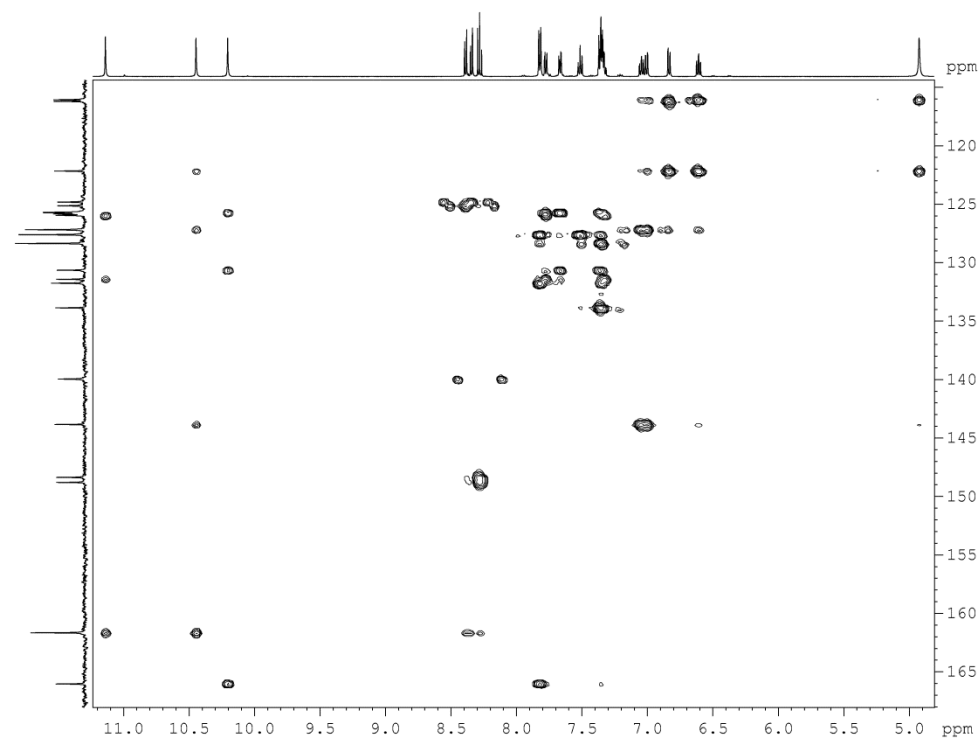

## 2 Powder X-ray diffraction and TGA-DTA data for foldamers 1 and 2

TG-DTA measurement was performed with a Perkin Elmer STA600 simultaneous thermal analyzer. Powder X-ray diffraction samples were pressed to a zero background silicon plate and the data was collected with a PANalytical X'Pert PRO MPD diffractometer in reflection mode with  $\text{CuK}\alpha 1$  radiation ( $\lambda = 1.5406 \text{ \AA}$ ). A  $2\theta$  angle range of  $3\text{-}35^\circ$  and step time of 170 s were used with a step resolution of  $0.016^\circ$ . The figures were drawn with X'Pert Highscore Plus.<sup>2</sup>

### 2.1 Foldamer 1

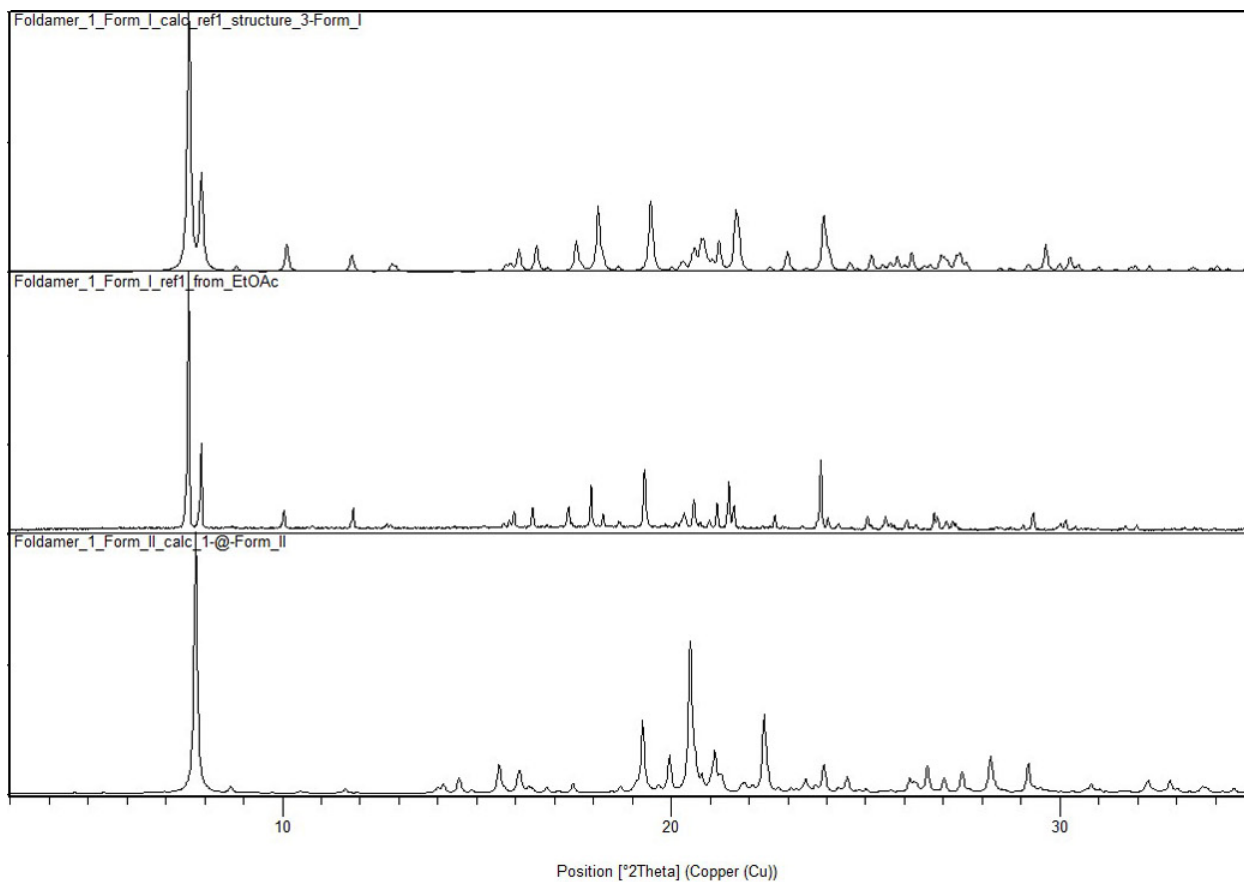

**Figure 1.** Examples of foldamer 1 PXRD patterns. The calculated patterns were produced with Mercury.<sup>3</sup>

## 2.2 Foldamer 2

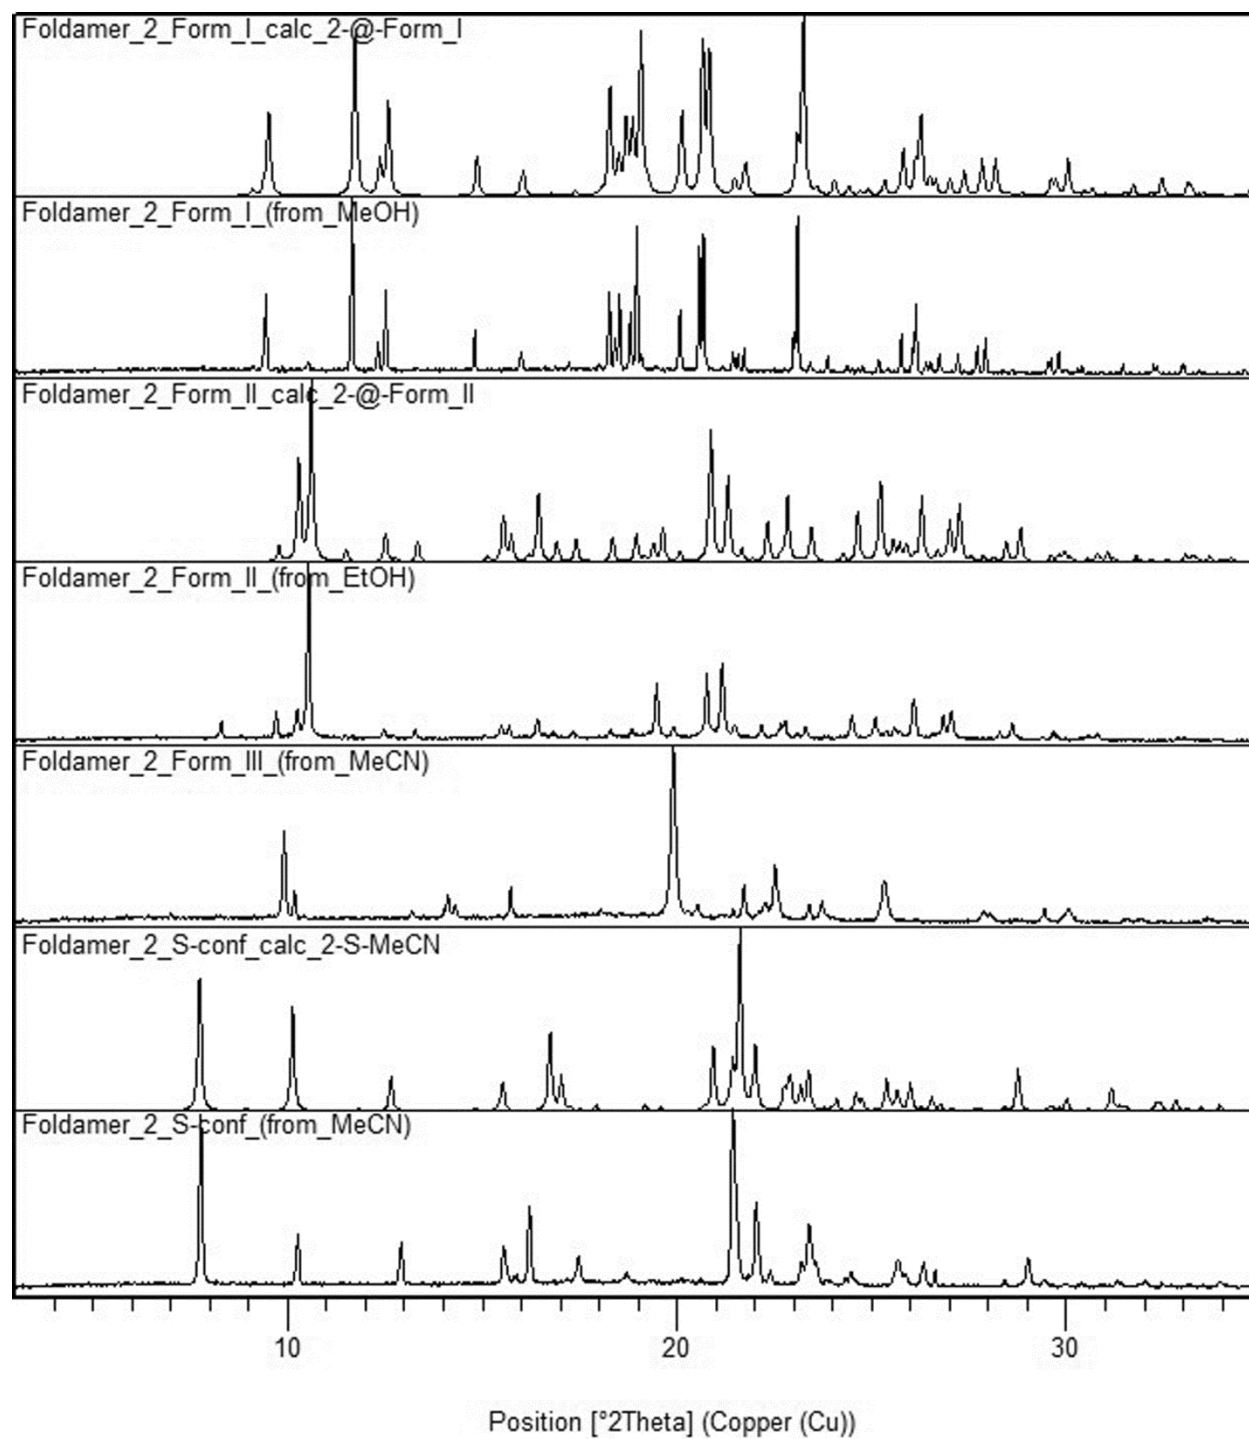

**Figure 2.** Examples of foldamer 2 PXRD patterns. The calculated patterns were produced with Mercury.<sup>3</sup>



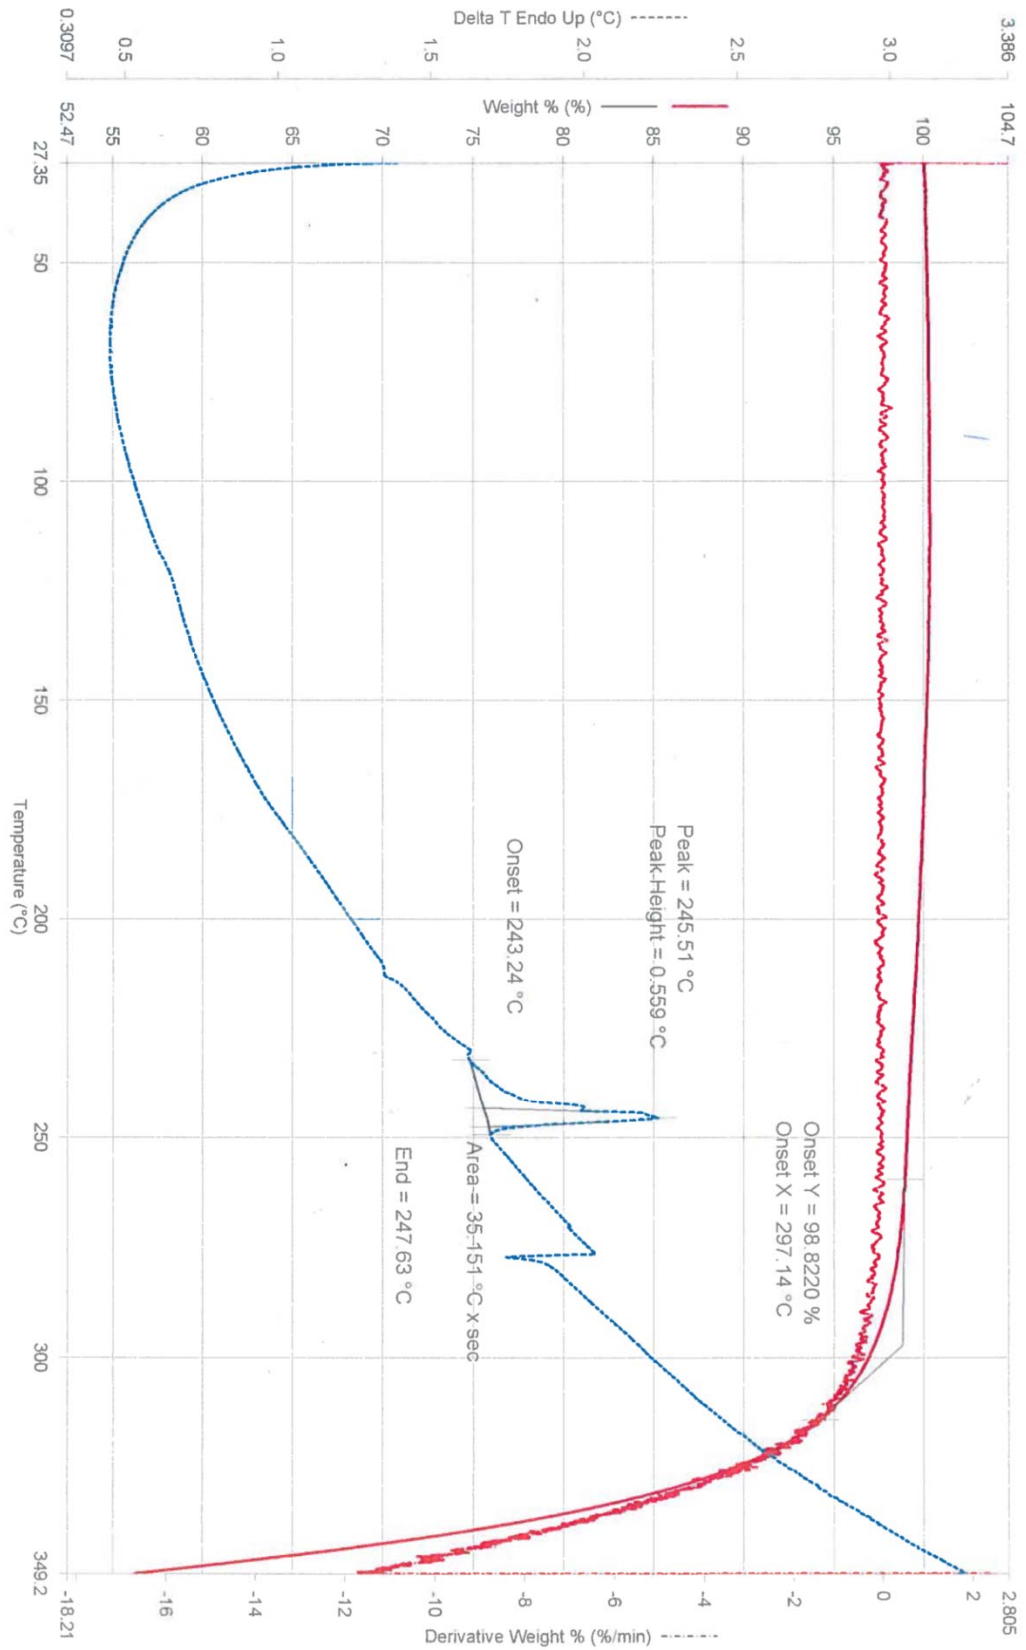

**Figure 3.** Foldamer 2 Form III TGA-DTA graph.

### 3 Additional crystallography material

#### 3.1 Details on the crystallization experiments

**Foldamer 1:** **1@**-Form I was obtained from ethyl acetate and acetonitrile solutions. The MeCN solvate of **1**, however, was obtained by seed crystallization from acetonitrile. The DMA solvate was obtained by evaporation crystallization from DMA. The DMSO-d<sub>6</sub> solvate (**1@**-DMSO-H<sub>2</sub>O), acetone-d<sub>6</sub> solvate (**1@**-Ac) and the polymorphic form II (**1@**-Form II) were obtained from the NMR samples that were transferred to test tubes for crystallization after the NMR measurements which were originally made to study the complexation behaviour of the pyridine foldamer with TBA-F trihydrate (DMSO-d<sub>6</sub> and Form II) or TBA-Cl (Acetone-d<sub>6</sub>). The sample producing the structure **1@**-DMSO-H<sub>2</sub>O had a 1:4 **1** to TBA-F ratio, **1@**-Form II had a 5:1 **1**:TBA-F ratio and **1@**-Ac had a 3:1 **1**:TBA-Cl ratio.

**Foldamers 2-7, general procedure:** Crystallization studies for compounds **2-7** were made in a series of different solvents (acetone, acetonitrile (MeCN), chloroform, 1,2-dichloroethane (DCE), dichloromethane (DCM), dimethylacetamide (DMA), dimethylformamide (DMF), dimethyl sulfoxide (DMSO), 1,4-dioxane, ethanol (EtOH), ethyl acetate (EtOAc), methanol (MeOH), tetrahydrofuran (THF) and toluene) by dissolving the amounts of 5-50 mg of compounds to 0.1-6 ml of solvent. In some cases, a small drop of DMA, DMF or DMSO (20-60 µl) was added to the solutions to increase the solubility. Foldamer **2** was additionally crystallized in *n*-propanol and by seed crystallization from DCM. Heating and stirring were used to help the dissolving process. After the compounds had dissolved the solutions were allowed to evaporate at room temperature until the crystals formed.

**Foldamer 2:** **2@**-Form I was obtained from acetone, but also the crystallization experiments from MeOH-DMA and EtOH-DMA solutions and from THF, DMSO and *n*-propanol produced the same crystal form based on the unit cell measurements. Crystallization from ethanol produced both unsolvated forms, **2@**-Form I and **2@**-Form II. Crystallization experiments from DMF produced both crystals of **2@**-Form I and **2@**-S-DMF solvate, and the crystallization experiments from DMA produced the crystals of **2@**-Form I, **2@**-Form II and **2@**-DMA solvate. Crystallization from DCM produced the crystals of **2@**-Form II and two different DCM solvates the foldamer adopting an S conformation. Polymorphic form II was also obtained from acetone.

*Foldamer 3*: The only observed crystal form for foldamer **3**, **3@**-Form I, was obtained from crystallization experiments from acetonitrile, DMF, ethyl acetate, acetone and methanol.

*Foldamer 4*: Four diffusion crystallizations were also made, which all produced previously published **4S**<sub>1</sub>-Form I structure. In diffusion crystallizations 2-5 mg of compound was dissolved in 1 ml of solvent and layered with 1 ml of antisolvent (solvent:antisolvent: EtOAc:hexane, MeOH:hexane, MeOH:water and MeCN:water). The same crystal form was also obtained by evaporation crystallizations from methanol, acetonitrile, DCE, DMF and CDCl<sub>3</sub>.

*Foldamer 5*: Crystal form **5@**<sub>2</sub>-Form I was obtained from ethyl acetate, acetone and DMSO solutions as well as MeOH-DMA and acetonitrile-DMA solutions.

*Foldamer 6*: In addition to acetone, also the crystallization experiments from ethyl acetate, acetonitrile, DMA, DMF and DMSO produced the crystals of **6S**<sub>2</sub>-Form I.

*Foldamer 7*: Form **7@**<sub>2</sub>-Form I was also obtained from methanol solution.

**Foldamer 8**: Crystallizations of foldamer **8** were attempted only in DMF, DMSO and DMA due to the low solubility of foldamer **8** yielding only precipitates with low crystallinity. The PXRD pattern measured from the DMF crystallization of foldamer **8** show that the sample is mostly amorphous but has also a crystalline component (Figure 4).

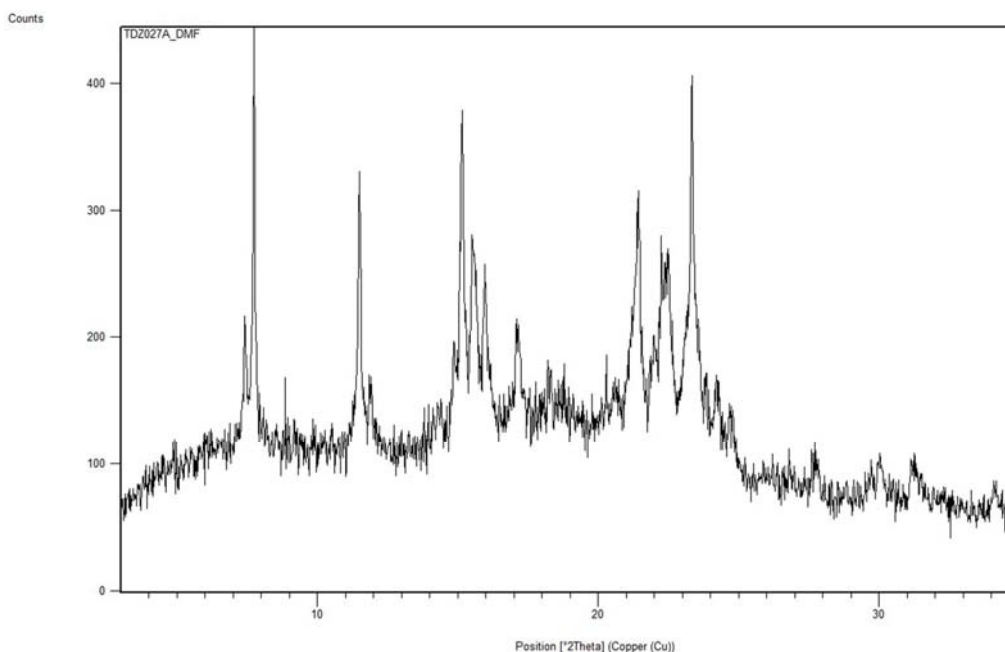

**Figure 4.** PXRD measured of foldamer **8** DMF crystallization.

### 3.2 Slurry experiments

Slurry of foldamer **1** was made by stirring 50 mg of the compound in 4 ml of MeCN for two weeks at room temperature. After two weeks the mixture was allowed to dry in open vessels. Slurries of the foldamer **2** were made by stirring 30-50 mg of the compound in 2 ml of solvent (acetone, MeCN, DCM, 1,4-dioxane, EtOH, EtOAc or THF) for two weeks at room temperature. After two weeks the mixtures were allowed to dry in open vessels. Analytical grade solvents and Millipore water were used for the slurries.

### 3.3 Crystal data and collection parameters for isomorphous solvates

**Table 1.** Crystal data and collection parameters for isomorphous solvates of **1**-@-DMA (**1**-@-MeCN and **1**@-Ac) and **7S**<sub>1</sub>-DMA (**7S**<sub>1</sub>-THF)

|                                       | <b>1</b> @-MeCN                                                                                    | <b>1</b> @-Ac                                                                                      | <b>7S</b> <sub>1</sub> -THF                                                                        |
|---------------------------------------|----------------------------------------------------------------------------------------------------|----------------------------------------------------------------------------------------------------|----------------------------------------------------------------------------------------------------|
| Formula                               | C <sub>33</sub> H <sub>25</sub> N <sub>5</sub> O <sub>4</sub> •<br>C <sub>2</sub> H <sub>3</sub> N | C <sub>33</sub> H <sub>25</sub> N <sub>5</sub> O <sub>4</sub> •<br>C <sub>3</sub> D <sub>6</sub> O | C <sub>35</sub> H <sub>25</sub> N <sub>6</sub> O <sub>4</sub> •<br>C <sub>4</sub> H <sub>8</sub> O |
| Crystallization solvent               | MeCN                                                                                               | Acetone-d <sub>6</sub>                                                                             | THF                                                                                                |
| M/gmol <sup>-1</sup>                  | 596.63                                                                                             | 619.69                                                                                             | 652.70                                                                                             |
| Crystal system                        | Monoclinic                                                                                         | Monoclinic                                                                                         | Monoclinic                                                                                         |
| Space group                           | P2 <sub>1</sub> /c                                                                                 | P2 <sub>1</sub> /c                                                                                 | P2 <sub>1</sub> /n                                                                                 |
| a/Å                                   | 13.934(3)                                                                                          | 13.8945(3)                                                                                         | 12.2684(4)                                                                                         |
| b/Å                                   | 19.1670(19)                                                                                        | 19.3946(4)                                                                                         | 20.2242(7)                                                                                         |
| c/Å                                   | 11.1543(14)                                                                                        | 11.2987(2)                                                                                         | 13.8112(5)                                                                                         |
| α/°                                   | 90                                                                                                 | 90                                                                                                 | 90                                                                                                 |
| β/°                                   | 94.855(18)                                                                                         | 92.960(2)                                                                                          | 98.246(2)                                                                                          |
| γ/°                                   | 90                                                                                                 | 90                                                                                                 | 90                                                                                                 |
| V/Å <sup>3</sup>                      | 2968.4(8)                                                                                          | 3040.69(10)                                                                                        | 3391.4(2)                                                                                          |
| Z                                     | 4                                                                                                  | 4                                                                                                  | 4                                                                                                  |
| ρ <sub>calc</sub> /g cm <sup>-3</sup> | 1.335                                                                                              | 1.354                                                                                              | 1.278                                                                                              |
| Meas. reflns                          | 13229                                                                                              | 10310                                                                                              | 10320                                                                                              |
| Indep. reflns                         | 5828                                                                                               | 6088                                                                                               | 5819                                                                                               |
| T/K                                   | 123                                                                                                | 123                                                                                                | 173                                                                                                |
| Radiation                             | Cu-Kα                                                                                              | Cu-Kα                                                                                              | Cu-Kα                                                                                              |
| λ/Å                                   | 1.5418                                                                                             | 1.5418                                                                                             | 1.54178                                                                                            |
| Monochromation                        | Mirror                                                                                             | Mirror                                                                                             | Graphite                                                                                           |
| Absorption correction                 | multi-scan                                                                                         | Analytical                                                                                         | multi-scan                                                                                         |
| Abs. Corr. program                    | CrysalisPro <sup>4</sup>                                                                           | CrysalisPro <sup>4</sup>                                                                           | Denzo-SMN 1997 <sup>5</sup>                                                                        |
| Refinement programs                   | SHELX-2013 <sup>6</sup> , ShelXle <sup>7</sup>                                                     | SHELX-2013 <sup>8</sup> , ShelXle <sup>9</sup>                                                     | SHELX-97 <sup>8</sup>                                                                              |
| R <sub>int</sub>                      | 0.0826                                                                                             | 0.0425                                                                                             | 0.0653                                                                                             |
| R <sub>1</sub> [I > 2σ(I)]            | 0.0591                                                                                             | 0.0581                                                                                             | 0.0830                                                                                             |
| wR <sub>2</sub> [I > 2σ(I)]           | 0.1500                                                                                             | 0.1478                                                                                             | 0.2100                                                                                             |
| Goof                                  | 0.952                                                                                              | 1.077                                                                                              | 1.031                                                                                              |

### 3.4 Crystal data and collection parameters for previously published structures

**Table 2.** Crystal data and collection parameters for structures discussed in the paper, but originally published in a previous paper.<sup>10</sup>

|                                       | <b>2@-Form I</b>                                              | <b>2S-MeCN</b>                                                                                     | <b>2@-S-DMF</b>                                                                                          | <b>4S<sub>1</sub>-Form I</b>                                  | <b>5@<sub>2</sub>-Form I</b>                                  | <b>5S<sub>1</sub>-Form II</b>                                 |
|---------------------------------------|---------------------------------------------------------------|----------------------------------------------------------------------------------------------------|----------------------------------------------------------------------------------------------------------|---------------------------------------------------------------|---------------------------------------------------------------|---------------------------------------------------------------|
| Formula                               | C <sub>26</sub> H <sub>20</sub> N <sub>4</sub> O <sub>3</sub> | C <sub>26</sub> H <sub>20</sub> N <sub>4</sub> O <sub>3</sub> •<br>C <sub>2</sub> H <sub>3</sub> N | 2x C <sub>26</sub> H <sub>20</sub> N <sub>4</sub> O <sub>3</sub> •<br>2xC <sub>3</sub> H <sub>7</sub> NO | C <sub>28</sub> H <sub>23</sub> N <sub>5</sub> O <sub>4</sub> | C <sub>30</sub> H <sub>27</sub> N <sub>5</sub> O <sub>4</sub> | C <sub>30</sub> H <sub>27</sub> N <sub>5</sub> O <sub>4</sub> |
| Crystallization solvent               | Acetone                                                       | MeCN                                                                                               | DMF                                                                                                      | Acetone                                                       | EtOAc                                                         | Toluene                                                       |
| M/gmol <sup>-1</sup>                  | 436.46                                                        | 477.51                                                                                             | 1019.0                                                                                                   | 493.51                                                        | 521.57                                                        | 521.57                                                        |
| Crystal system                        | Orthorhombic                                                  | Triclinic                                                                                          | Triclinic                                                                                                | Triclinic                                                     | Monoclinic                                                    | Monoclinic                                                    |
| Space group                           | P2 <sub>1</sub> 2 <sub>1</sub> 2 <sub>1</sub>                 | P-1                                                                                                | P-1                                                                                                      | P-1                                                           | P2 <sub>1</sub> /c                                            | P2 <sub>1</sub> /n                                            |
| a/Å                                   | 10.5611(3)                                                    | 8.8168(1)*                                                                                         | 9.1113(4)                                                                                                | 8.8855(7)                                                     | 10.9496(6)                                                    | 8.6808(4)                                                     |
| b/Å                                   | 10.7433(4)                                                    | 12.1010(1)                                                                                         | 13.2244(6)                                                                                               | 11.9875(10)                                                   | 25.1634(12)                                                   | 27.9305(12)                                                   |
| c/Å                                   | 19.3836(6)                                                    | 12.2384(1)                                                                                         | 21.6506(11)                                                                                              | 12.8210(11)                                                   | 9.6787(4)                                                     | 11.8298(6)                                                    |
| α/°                                   | 90                                                            | 70.3574(1)                                                                                         | 89.589(3)                                                                                                | 73.667(3)                                                     | 90                                                            | 90                                                            |
| β/°                                   | 90                                                            | 81.4003(1)                                                                                         | 85.854(2)                                                                                                | 72.430(3)                                                     | 103.832(3)                                                    | 110.663(3)                                                    |
| γ/°                                   | 90                                                            | 88.0499(1)                                                                                         | 84.031(2)                                                                                                | 75.241(2)                                                     | 90                                                            | 90                                                            |
| V/Å <sup>3</sup>                      | 2199.3(2)                                                     | 1215.74(5)                                                                                         | 2587.8(2)                                                                                                | 1227.7(2)                                                     | 2589.4(2)                                                     | 2683.7(2)                                                     |
| Z                                     | 4                                                             | 2                                                                                                  | 4                                                                                                        | 2                                                             | 4                                                             | 4                                                             |
| ρ <sub>calc</sub> /g cm <sup>-3</sup> | 1.318                                                         | 1.304                                                                                              | 1.308                                                                                                    | 1.335                                                         | 1.338                                                         | 1.291                                                         |
| Meas. reflns                          | 11801                                                         | 5652                                                                                               | 13074                                                                                                    | 5502                                                          | 7545                                                          | 7773                                                          |
| Indep. reflns                         | 3762                                                          | 3936                                                                                               | 8822                                                                                                     | 3964                                                          | 4398                                                          | 4458                                                          |
| R <sub>int</sub>                      | 0.0293                                                        | 0.0703                                                                                             | 0.0649                                                                                                   | 0.1054                                                        | 0.0749                                                        | 0.0768                                                        |
| R <sub>i</sub> [I > 2σ(I)]            | 0.0427                                                        | 0.0544                                                                                             | 0.0539                                                                                                   | 0.0586                                                        | 0.0572                                                        | 0.0642                                                        |
| wR <sub>2</sub> [I > 2σ(I)]           | 0.0968                                                        | 0.1315                                                                                             | 0.1288                                                                                                   | 0.1222                                                        | 0.1277                                                        | 0.1473                                                        |
| Goof                                  | 1.064                                                         | 1.020                                                                                              | 1.018                                                                                                    | 1.058                                                         | 1.026                                                         | 1.074                                                         |

|                                       | <b>6S<sub>2</sub>-Form I</b>                                  | <b>7@<sub>2</sub>-Form I</b>                                  | <b>7S<sub>1</sub>-EtOAc</b>                                                                                     |
|---------------------------------------|---------------------------------------------------------------|---------------------------------------------------------------|-----------------------------------------------------------------------------------------------------------------|
| Formula                               | C <sub>31</sub> H <sub>29</sub> N <sub>5</sub> O <sub>4</sub> | C <sub>34</sub> H <sub>24</sub> N <sub>6</sub> O <sub>4</sub> | C <sub>34</sub> H <sub>24</sub> N <sub>6</sub> O <sub>4</sub> •<br>C <sub>4</sub> H <sub>8</sub> O <sub>2</sub> |
| Crystallization solvent               | Acetone                                                       | MeCN                                                          | EtOAc                                                                                                           |
| M/gmol <sup>-1</sup>                  | 535.59                                                        | 580.59                                                        | 668.70                                                                                                          |
| Crystal system                        | Triclinic                                                     | Monoclinic                                                    | Monoclinic                                                                                                      |
| Space group                           | P-1                                                           | P2 <sub>1</sub> /c                                            | P2 <sub>1</sub> /c                                                                                              |
| a/Å                                   | 9.6020(2)                                                     | 12.7434(9)                                                    | 12.6680(5)                                                                                                      |
| b/Å                                   | 10.6657(2)                                                    | 19.5084(13)                                                   | 20.0990(8)                                                                                                      |
| c/Å                                   | 13.7389(3)                                                    | 11.4050(8)                                                    | 16.7620(6)                                                                                                      |
| α/°                                   | 89.617(3)                                                     | 90                                                            | 90                                                                                                              |
| β/°                                   | 83.538(3)                                                     | 98.925(4)                                                     | 128.179(2)                                                                                                      |
| γ/°                                   | 76.401(3)                                                     | 90                                                            | 90                                                                                                              |
| V/Å <sup>3</sup>                      | 1358.8(1)                                                     | 2801.0(3)                                                     | 3354.9(2)                                                                                                       |
| Z                                     | 2                                                             | 4                                                             | 4                                                                                                               |
| ρ <sub>calc</sub> /g cm <sup>-3</sup> | 1.309                                                         | 1.377                                                         | 1.324                                                                                                           |
| Meas. reflns                          | 6417                                                          | 7686                                                          | 9999                                                                                                            |
| Indep. reflns                         | 4610                                                          | 4576                                                          | 5487                                                                                                            |
| R <sub>int</sub>                      | 0.0539                                                        | 0.1610                                                        | 0.0854                                                                                                          |
| R <sub>i</sub> [I > 2σ(I)]            | 0.0489                                                        | 0.0720                                                        | 0.0636                                                                                                          |
| wR <sub>2</sub> [I > 2σ(I)]           | 0.1165                                                        | 0.1348                                                        | 0.1304                                                                                                          |
| Goof                                  | 1.032                                                         | 1.105                                                         | 1.046                                                                                                           |

### 3.5 Notes on the crystallographic data

**1@-Form II** was crystallized from DMSO-d<sub>6</sub> with TBA-F trihydrate (1:TBA-F 5:1) by slow evaporation as colorless block crystals. Seven ( $I_{\text{obs}}-I_{\text{calc}}/SigmaW$ ) outliers are likely caused by non-merohedral twinning. The twinned component is very small and has only little effect on the overall quality of the structure.

**1@-DMA** was crystallized from DMA by slow evaporation as colorless plate crystals. DMA molecule is disordered over two partially overlapped positions (85:15). Four EADP and EXYZ restraints were used to build the model.

**1@-DMSO-H<sub>2</sub>O** was crystallized from DMSO-d<sub>6</sub> in the presence of TBA-F trihydrate (1:TBA-F 1:4) by slow evaporation as colorless needle crystals. Four ( $I_{\text{obs}}-I_{\text{calc}}/SigmaW$ ) outliers are likely caused by faults in the crystal. The O-H bond lengths of the water molecule were restrained to 0.82 Å using DFIX.

**1@-MeCN** was crystallized from MeCN seed crystallization as colorless plate crystals. Seed crystals were obtained from MeCN slurry (see page 6 for details of the slurry experiments).

**1@-Ac** was crystallized from acetone-d<sub>6</sub> in the presence of TBA-Cl (1:TBA-Cl 3:1) by slow evaporation as colorless needle crystals. Two ( $I_{\text{obs}}-I_{\text{calc}}/SigmaW$ ) outliers are likely caused by faults in the crystal. Low solvent  $U_{\text{eq}}$  of carbonyl C100 compared to neighbors is due to the larger  $U_{\text{eq}}$  of the adjacent methyl groups. Reflection 1 0 0 was omitted (OMIT) because it was blocked by the beamstop of the instrument.

**2@-Form II** was crystallized from DMA by slow evaporation as colorless plate crystals.

**2@-DMA** was crystallized from 1,4-dioxane-DMA solution as colorless block crystals. The DMA molecule is disordered over two partially overlapped positions (site occupancies 67:33). Three EADP and EXYZ restraints were used to build the chemically reasonable model.

**2S-DCM-1** was crystallized from DCM with the help of seed crystals obtained from DCM slurry (see page 6 for details of the slurry experiments). The structure crystallized as colorless block crystals. The DCM molecule is disordered over two positions (site occupancies 50:50 for the chlorine atoms). Large solvent  $U_{\text{eq}}(\text{max})/U_{\text{eq}}(\text{min})$  ratio is caused by the solvent disorder. High  $U_{\text{eq}}$  of C23 is caused by the disordered solvent molecule nearby. Short intramolecular hydrogen-hydrogen distance of 1.98 Å between aromatic H1 and amide H1N is caused by the intramolecular hydrogen bonding between H1N and O2 and intermolecular hydrogen bonding between O1 and H2N and O1 and H3N.

**2S-DCM-2** was crystallized from DCM by very slow evaporation crystallization (closed container) as colorless block crystals. DCM molecule is disordered over an inversion center (site occupancies 50:50).

**3@-Form I** was crystallized from MeCN by slow evaporation as colorless block crystals. Four  $(I_{\text{obs}}-I_{\text{calc}})/\text{SigmaW}$  outliers are likely caused by non-merohedral twinning. The twinned component is very small and has only little effect on the overall quality of the structure. No hydrogen bond is formed by the hydrogen bond donor H5NB due to crystal packing.

**4S<sub>1</sub>-Form II** was crystallized from EtOAc by slow evaporation as colorless plate crystals.

**4S<sub>1</sub>-DMSO** was crystallized from DMSO by slow evaporation as colorless plate crystals. Both DMSO molecules are disordered with site occupancies 80:20 and 92:8. Four EADP and three EXYZ restraints were used to build the models. The bond lengths between nitrogen and hydrogen atoms were restrained to 0.84 Å using DFIX.

**4S<sub>1</sub>-Diox** was crystallized from 1,4-dioxane by slow evaporation as colorless plate crystals. Reflections 1 0 0, 1 -1 1, -1 0 1, -1 1 0, -1 -1 1 and 0 -1 2 were omitted (OMIT) because they were blocked by the beamstop of the instrument.

**6S<sub>2</sub>-Diox** was crystallized from 1,4-dioxane by slow evaporation as colorless block crystals.

**7S<sub>1</sub>-CHCl<sub>3</sub>** was crystallized from CHCl<sub>3</sub> by slow evaporation as colorless block crystals. CHCl<sub>3</sub> molecule is disordered over two positions (74:26). EADP restraint was used on the C atom of CHCl<sub>3</sub> to model the disordered positions of C10A and C10B. DFIX was used to restrain distances between disordered carbon C10B and chlorides CL2B and CL3B to 1.79 Å. The bond lengths between nitrogen and hydrogen are restrained to 0.84 Å using DFIX. An unlikely bond between disordered chlorides Cl2B and Cl3B was removed with FREE. The high anion/solvent ADP max/min ratio of atom Cl2B is due to the disorder of the chloroform molecule.

**7S<sub>1</sub>-THF** was crystallized from THF by slow evaporation as colorless block crystals. High electron density is located near the severely disordered THF molecule. No reasonable model for the disorder could be built and THF was refined isotropically. The structure contains a solvent accessible void (42 Å<sup>3</sup>) near the disordered THF molecule.

**7S<sub>1</sub>-DMA** was crystallized from DMA by slow evaporation as colorless block crystals. Short intramolecular hydrogen-hydrogen distance between H10F and H10G is due to non-optimal calculated atom positions.

### 3.6 Packing coefficient analysis

The structures discussed in the paper (Table 1) have an average packing coefficient of  $0.717 \pm 0.015$ . The average packing coefficient of @-conformation structures was  $0.723 \pm 0.013$  and the packing coefficient for S-conformation structures was  $0.709 \pm 0.015$ . The difference between the average @- and S-conformation packing coefficients is 0.014. The average packing coefficients of the structures are separated by roughly one standard deviation which, while not statistically relevant, indicates a trend where the @-conformation structures tend to pack more efficiently.



## 3.7 Additional Foldamer Figures

### 3.7.1 Foldamer 1

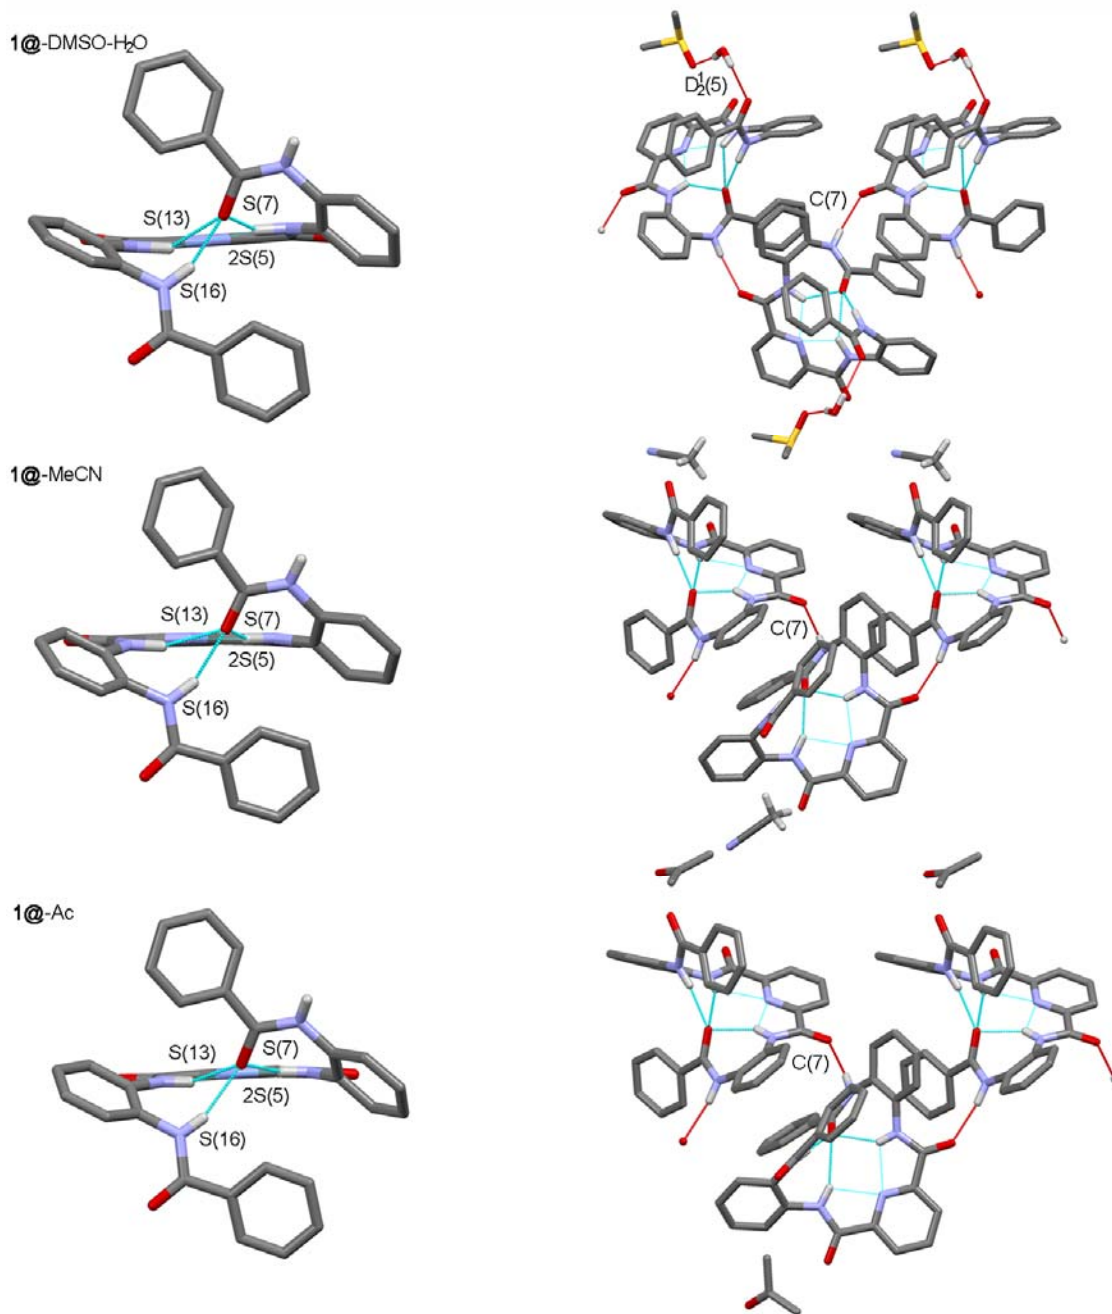

**Figure 5.** The conformations and crystal packing of foldamer **1**. The conformation presented for the structure **1@-Form II** is the molecule that is not in a perfect @-conformation. Two other molecules in the asymmetric unit adopting an @-conformation are not shown. Non-hydrogen bonding hydrogens and DMA disorder have been removed for clarity.

### 3.7.2 Foldamer 2

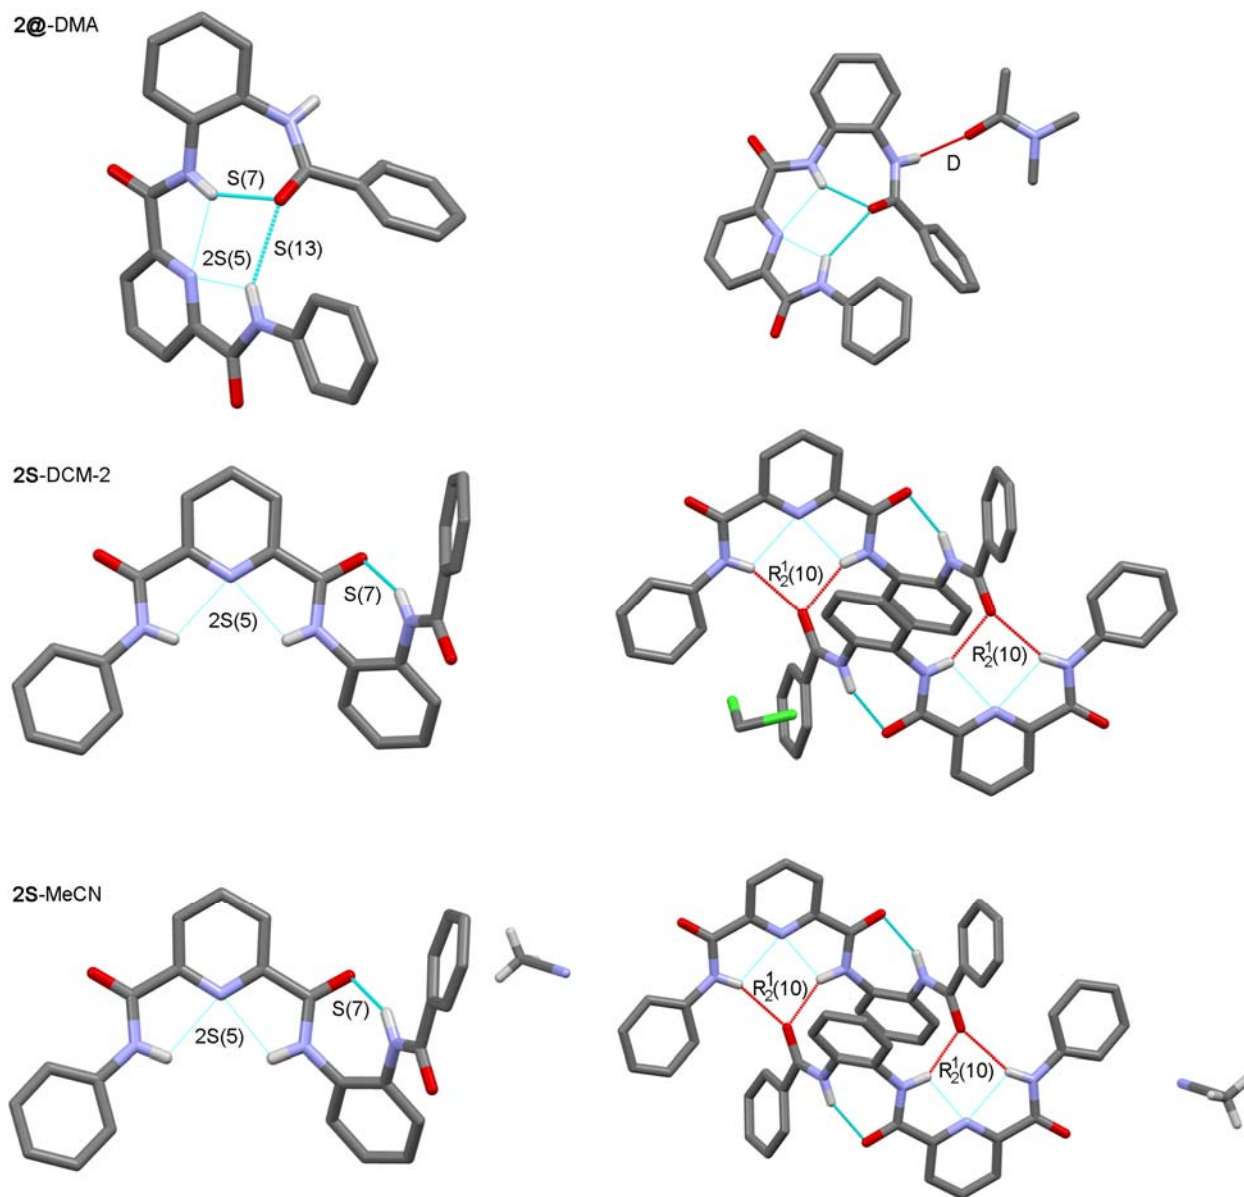

**Figure 6.** The conformations and crystal packing of foldamer **2**. Non-hydrogen bonding hydrogens and DMA disorder have been removed for clarity.

### 3.7.3 Foldamer 3

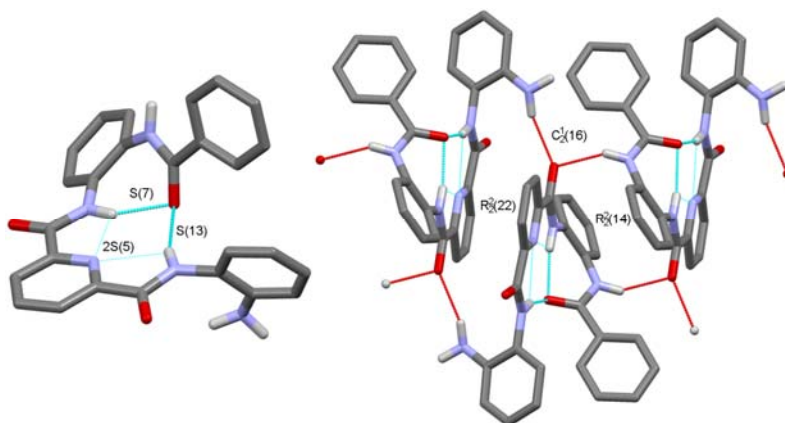

**Figure 7.** The conformation and crystal packing of foldamer **3**. Non-hydrogen bonding hydrogens have been removed for clarity.

### 3.7.4 Foldamer 4

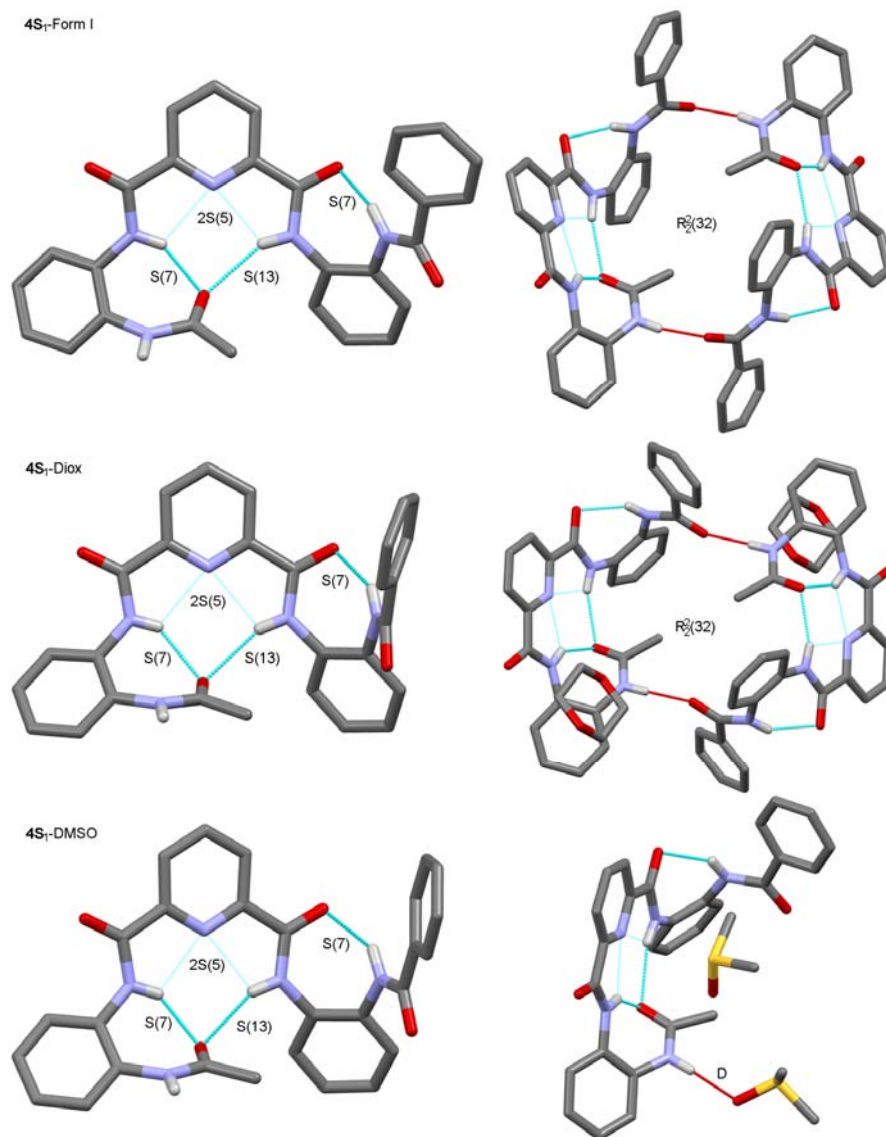

**Figure 8.** The conformation and crystal packing of foldamer 4. Non-hydrogen bonding hydrogens and DMSO disorder have been removed for clarity.

### 3.7.5 Foldamer 5

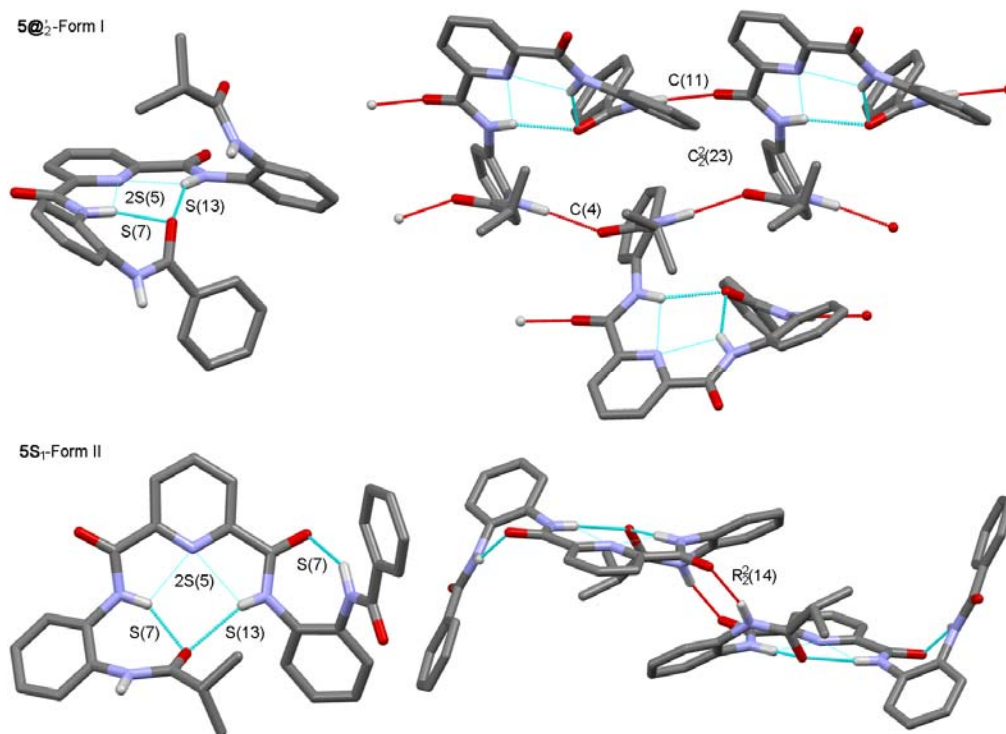

**Figure 9.** The conformation and crystal packing of foldamer **5**. Non-hydrogen bonding hydrogens have been removed for clarity.

### 3.7.6 Foldamer 6

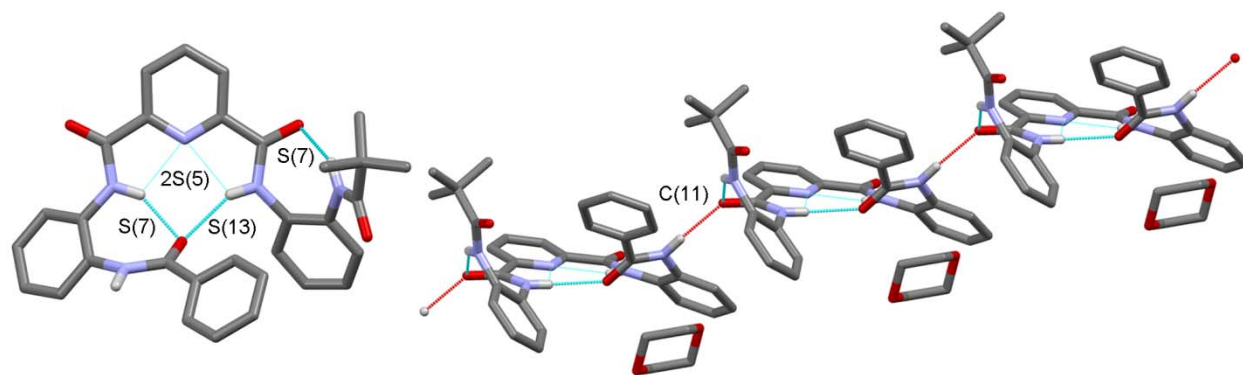

**Figure 10.** The conformation and crystal packing of foldamer **6**. Non-hydrogen bonding hydrogens have been removed for clarity.

### 3.7.7 Foldamer 7

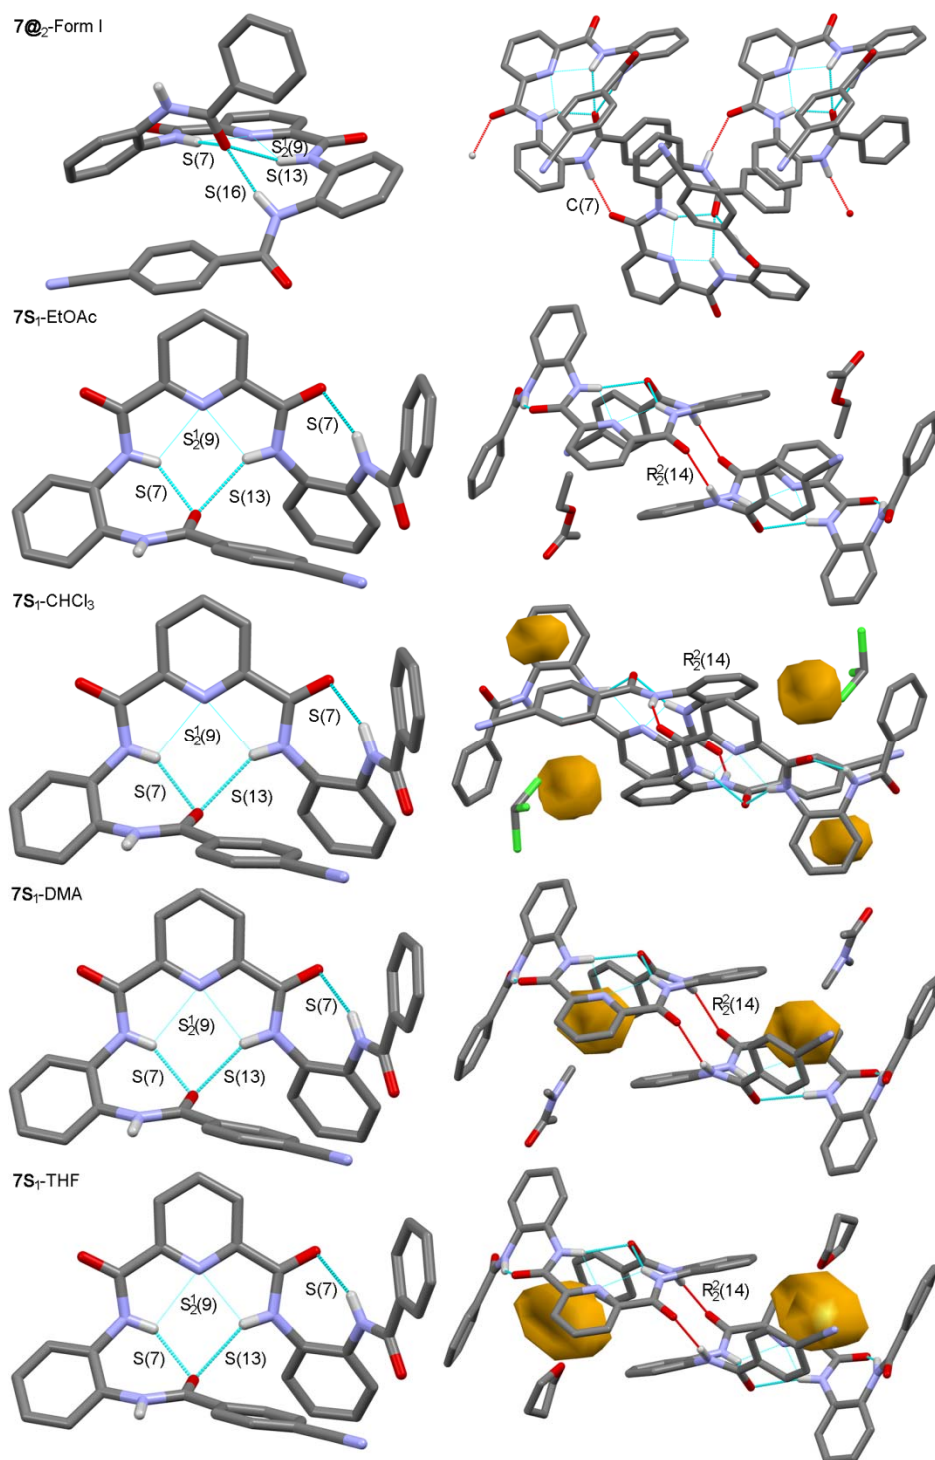

**Figure 11.** The conformation and crystal packing of foldamer 7. Non-hydrogen bonding hydrogens and CHCl<sub>3</sub> disorder have been removed for clarity. Voids that were visualized with Mercury<sup>3</sup> are presented with yellow.



### 3.8 Hydrogen bonding parameters

**Table 3.** Hydrogen bonding parameters for the crystal structures.

#### 1@-Form II

| Intramolecular   |            |           | Intermolecular   |            |           |
|------------------|------------|-----------|------------------|------------|-----------|
| Bond             | d(D...A)   | <(DHA)    | Bond             | d(D...A)   | <(DHA)    |
| N101-H11N...O104 | 2.9090(17) | 153.9(18) | N104-H14N...O302 | 2.8365(16) | 162.4(17) |
| N102-H12N...O104 | 3.0990(17) | 143.8(17) | N201-H21N...O301 | 2.9793(17) | 144.9(17) |
| N102-H12N...N105 | 2.6417(18) | 114.5(16) | N204-H24N...O101 | 2.8488(17) | 151.4(16) |
| N103-H13N...O104 | 2.7975(17) | 142.1(18) | N304-H34N...O202 | 2.9302(16) | 169.3(17) |
| N103-H13N...N105 | 2.6579(17) | 113.7(16) |                  |            |           |
| N202-H22N...O201 | 2.8375(17) | 136.2(16) |                  |            |           |
| N203-H23N...N205 | 2.6870(17) | 112.8(16) |                  |            |           |
| N301-H31N...O304 | 2.9717(16) | 154.8(18) |                  |            |           |
| N302-H32N...O304 | 2.1983(16) | 150.6(16) |                  |            |           |
| N302-H32N...N305 | 2.6595(17) | 111.0(14) |                  |            |           |
| N303-H33N...O304 | 2.7888(16) | 143.5(17) |                  |            |           |
| N303-H33N...N305 | 2.6700(17) | 111.0(15) |                  |            |           |

#### 1@-DMA

| Intramolecular |            |           | Intermolecular |            |           |
|----------------|------------|-----------|----------------|------------|-----------|
| Bond           | d(D...A)   | <(DHA)    | Bond           | d(D...A)   | <(DHA)    |
| N1-H1N...O4    | 2.8676(14) | 154.3(15) | N4-H4N...O3    | 2.9849(14) | 164.4(15) |
| N2-H2N...O4    | 3.1551(14) | 140.5(15) |                |            |           |
| N2-H2N...N5    | 2.6424(15) | 114.9(15) |                |            |           |
| N3-H3N...O4    | 2.6935(13) | 140.7(15) |                |            |           |
| N3-H3N...N5    | 2.6429(14) | 112.3(13) |                |            |           |

#### 1@-DMSO-H<sub>2</sub>O

| Intramolecular |          |        | Intermolecular  |          |        |
|----------------|----------|--------|-----------------|----------|--------|
| Bond           | d(D...A) | <(DHA) | Bond            | d(D...A) | <(DHA) |
| N1-H1N...O4    | 2.813(4) | 154(4) | N4-H4N...O3     | 2.977(4) | 171(4) |
| N2-H2N...O4    | 3.173(4) | 142(4) | O200-H1O...O100 | 2.872(5) | 169(6) |
| N3-H3N...O4    | 2.684(3) | 136(4) | O200-H2O...O1   | 2.903(4) | 173(6) |
| N3-H3N...N5    | 2.644(4) | 114(3) |                 |          |        |

#### 1@-MeCN

| Intramolecular |          |        | Intermolecular |          |        |
|----------------|----------|--------|----------------|----------|--------|
| Bond           | d(D...A) | <(DHA) | Bond           | d(D...A) | <(DHA) |
| N2-H2...O1     | 2.693(3) | 139(4) | N1-H1...O2     | 2.913(3) | 163(5) |
| N3-H3...O1     | 3.073(3) | 152(4) |                |          |        |
| N4-H4...O1     | 2.878(3) | 158(4) |                |          |        |
| N2-H2...N5     | 2.635(3) | 112(4) |                |          |        |

#### 1@-Ac

| Intramolecular |          |        | Intermolecular |          |        |
|----------------|----------|--------|----------------|----------|--------|
| Bond           | d(D...A) | <(DHA) | Bond           | d(D...A) | <(DHA) |
| N2-H2N...O1    | 2.694(2) | 142(3) | N1-H1N...O2    | 2.929(2) | 170(3) |
| N2-H2N...N5    | 2.635(3) | 116(3) |                |          |        |
| N3-H3N...O1    | 3.045(2) | 153(3) |                |          |        |
| N4-H4N...O1    | 2.869(3) | 161(3) |                |          |        |

**2@-Form II**

| Intramolecular |          |        | Intermolecular |          |        |
|----------------|----------|--------|----------------|----------|--------|
| Bond           | d(D...A) | <(DHA) | Bond           | d(D...A) | <(DHA) |
| N2-H2N...O1    | 2.682(3) | 145(2) | N1-H1N...O2    | 2.989(3) | 163(2) |
| N2-H2N...N4    | 2.643(3) | 107(2) |                |          |        |
| N3-H3N...O1    | 3.207(3) | 153(2) |                |          |        |
| N3-H3N...N4    | 2.684(3) | 114(2) |                |          |        |

**2@-DMA**

| Intramolecular |          |        | Intermolecular |          |        |
|----------------|----------|--------|----------------|----------|--------|
| Bond           | d(D...A) | <(DHA) | Bond           | d(D...A) | <(DHA) |
| N2-H2N...O1    | 2.732(3) | 146(2) | N1-H1N...O100  | 2.939(3) | 160(2) |
| N2-H2N...N4    | 2.667(3) | 110(2) |                |          |        |
| N3-H3N...O1    | 3.263(3) | 149(2) |                |          |        |
| N3-H3N...N4    | 2.694(3) | 112(2) |                |          |        |

**2S-DCM-1**

| Intramolecular |          |        | Intermolecular |          |        |
|----------------|----------|--------|----------------|----------|--------|
| Bond           | d(D...A) | <(DHA) | Bond           | d(D...A) | <(DHA) |
| N1-H1N...O2    | 2.730(3) | 151(3) | N2-H2N...O1    | 2.869(3) | 150(3) |
| N2-H2N...N4    | 2.695(3) | 107(3) | N3-H3N...O1    | 3.200(3) | 155(3) |
| N3-H3N...N4    | 2.725(3) | 113(3) |                |          |        |

**2S-DCM-2**

| Intramolecular |          |        | Intermolecular |          |        |
|----------------|----------|--------|----------------|----------|--------|
| Bond           | d(D...A) | <(DHA) | Bond           | d(D...A) | <(DHA) |
| N1-H1N...O2    | 2.704(2) | 147(3) | N2-H2N...O1    | 2.857(2) | 154(3) |
| N2-H2N...N4    | 2.685(2) | 109(2) | N3-H3N...O1    | 3.083(2) | 157(3) |
| N3-H3N...N4    | 2.726(3) | 111(2) |                |          |        |

**3@-Form I**

| Intramolecular |            |           | Intermolecular |            |           |
|----------------|------------|-----------|----------------|------------|-----------|
| Bond           | d(D...A)   | <(DHA)    | Bond           | d(D...A)   | <(DHA)    |
| N2-H2N...O1    | 2.7279(15) | 148.4(16) | N1-H1N...O2    | 2.8667(17) | 150.8(16) |
| N3-H3N...O1    | 3.1757(17) | 164.4(16) | N5-H5NA...O2   | 3.0881(17) | 164.2(17) |

**4S<sub>1</sub>-Form II**

| Intramolecular |          |        | Intermolecular |          |        |
|----------------|----------|--------|----------------|----------|--------|
| Bond           | d(D...A) | <(DHA) | Bond           | d(D...A) | <(DHA) |
| N1-H1N...O2    | 2.686(3) | 142(3) | N4-H4N...O1    | 2.844(3) | 167(3) |
| N2-H2N...O4    | 3.013(3) | 153(2) |                |          |        |
| N2-H2N...N5    | 2.671(3) | 110(2) |                |          |        |
| N3-H3N...O4    | 2.739(3) | 144(3) |                |          |        |
| N3-H3N...N5    | 2.648(3) | 114(2) |                |          |        |

**4S<sub>1</sub>-Diox**

| Intramolecular |          |           | Intermolecular |          |        |
|----------------|----------|-----------|----------------|----------|--------|
| Bond           | d(D...A) | <(DHA)    | Bond           | d(D...A) | <(DHA) |
| N1-H1N...O2    | 2.699(2) | 146(2)    | N4-H4N...O1    | 2.875(2) | 177(2) |
| N2-H2N...O4    | 3.014(2) | 157(2)    |                |          |        |
| N2-H2N...N5    | 2.663(2) | 107.6(18) |                |          |        |
| N3-H3N...O4    | 2.720(2) | 143(2)    |                |          |        |
| N3-H3N...N5    | 2.642(2) | 116(2)    |                |          |        |



**4S<sub>1</sub>-DMSO**

| Intramolecular |          |           | Intermolecular |          |        |
|----------------|----------|-----------|----------------|----------|--------|
| Bond           | d(D...A) | <(DHA)    | Bond           | d(D...A) | <(DHA) |
| N1-H1N...O2    | 2.702(2) | 144(2)    | N4-H4N...O11A  | 2.826(2) | 174(2) |
| N2-H2N...O4    | 2.986(2) | 157(2)    |                |          |        |
| N2-H2N...N5    | 2.674(2) | 109.7(18) |                |          |        |
| N3-H3N...O4    | 2.724(2) | 148(2)    |                |          |        |
| N3-H3N...N5    | 2.635(2) | 111.2(18) |                |          |        |

**6S<sub>2</sub>-Diox**

| Intramolecular |          |           | Intermolecular |          |           |
|----------------|----------|-----------|----------------|----------|-----------|
| Bond           | d(D...A) | <(DHA)    | Bond           | d(D...A) | <(DHA)    |
| N2-H2N...O1    | 2.726(2) | 148(2)    | N1-H1N...O3    | 2.906(2) | 159.5(19) |
| N2-H2N...N5    | 2.641(2) | 111.6(18) |                |          |           |
| N3-H3N...O1    | 2.911(2) | 152(2)    |                |          |           |
| N3-H3N...N5    | 2.662(2) | 112.3(18) |                |          |           |
| N4-H4N...O3    | 2.765(2) | 144(2)    |                |          |           |

**7S<sub>1</sub>-CHCl<sub>3</sub>**

| Intramolecular |            |           | Intermolecular |          |        |
|----------------|------------|-----------|----------------|----------|--------|
| Bond           | d(D...A)   | <(DHA)    | Bond           | d(D...A) | <(DHA) |
| N1-H1N...O2    | 2.719(2)   | 151(2)    | N4-H4N...O3    | 2.827(2) | 160(2) |
| N2-H2N...O4    | 3.0117(2)  | 149(2)    |                |          |        |
| N2-H2N...N5    | 2.643(4)   | 112.9(19) |                |          |        |
| N3-H3N...O4    | 2.7488(19) | 145(2)    |                |          |        |
| N3-H3N...N5    | 2.653(2)   | 110.4(17) |                |          |        |

**7S<sub>1</sub>-THF**

| Intramolecular |          |        | Intermolecular |          |        |
|----------------|----------|--------|----------------|----------|--------|
| Bond           | d(D...A) | <(DHA) | Bond           | d(D...A) | <(DHA) |
| N1-H1N...O2    | 2.744(4) | 148(4) | N4-H4N...O3    | 2.837(4) | 153(4) |
| N2-H2N...O4    | 3.127(4) | 150(4) |                |          |        |
| N2-H2N...N5    | 2.649(4) | 112(3) |                |          |        |
| N3-H3N...O4    | 2.750(4) | 148(4) |                |          |        |
| N3-H3N...N5    | 2.662(4) | 107(3) |                |          |        |

**7S<sub>1</sub>-DMA**

| Intramolecular |          |        | Intermolecular |          |        |
|----------------|----------|--------|----------------|----------|--------|
| Bond           | d(D...A) | <(DHA) | Bond           | d(D...A) | <(DHA) |
| N1-H1N...O2    | 2.765(4) | 149(4) | N4-H4N...O3    | 2.869(5) | 146(5) |
| N2-H2N...O4    | 3.085(4) | 150(3) |                |          |        |
| N2-H2N...N5    | 2.648(4) | 106(3) |                |          |        |
| N3-H3N...O4    | 2.736(4) | 151(4) |                |          |        |
| N3-H3N...N5    | 2.667(4) | 106(3) |                |          |        |

## 4 References

---

- 1 F. Stomeo, C. Lincheneau, J. P. Leonard, J. E. O'Brien, R. D. Peacock, C. P. McCoy and T. Gunnlaugsson, *J. Am. Chem. Soc.*, 2009, **131**, 9636.
- 2 PANalytical B. V., 2006, 2.2b.
- 3 C. F. Macrae, P. R. Edgington, P. McCabe, E. Pidcock, G. P. Shields, R. Taylor, M. Towler and J. van de Streek, *J. Appl. Cryst.*, 2006, **39**, 453.
- 4 Agilent (2011), CrysAlisPRO, Agilent Technologies UK Ltd, Yarnton, England.
- 5 Z. Otwinowski, D. Borek, W. Majewski and W. Minor, *Acta Crystallogr. A.*, 2003, **59**, 228.
- 6 G. M. Sheldrick, *Acta Crystallogr. A.*, 2008, **64**, 112.
- 7 C. B. Hübschle, G. M. Sheldrick and B. Dittrich, *J. Appl. Cryst.*, 2011, **44**, 1281.
- 8 G. M. Sheldrick, *Acta Crystallogr. A.*, 2008, **64**, 112.
- 9 C. B. Hübschle, G. M. Sheldrick and B. Dittrich, *J. Appl. Cryst.*, 2011, **44**, 1281.
- 10 M. Kortelainen, A. Suhonen, A. Hamza, I. Pápai, E. Nauha, S. Yliniemelä-Sipari, M. Nissinen and P. Pihko, *Chem. Eur. J.*, 2015, **22**, 9493.
